# Supplementary material
Source: PubMed Central journal article supplement (PMC3930144)
Supplement: NIHMS552489-supplement-Supp_Data_S1-S4.pdf [file NIHMS552489-supplement-Supp_Data_S1-S4.pdf]

| Key probabilities used in the decision analysis model (based on PECARN data; N = 12,044)                                 |                        |
|--------------------------------------------------------------------------------------------------------------------------|------------------------|
| Probability                                                                                                              | n (%)                  |
| <b>IAI*</b>                                                                                                              |                        |
| Patients with IAI                                                                                                        | 203/12,044 (1.7)       |
| Patients with IAI who died from IAI                                                                                      | 9/203 (4.4)            |
| Patients with IAI who required therapeutic laparotomy or angiography                                                     | 125/203 (61.6)         |
| Patients with IAI who required a blood transfusion or IV fluids $\geq 2$ nights for pancreas / gastrointestinal injuries | 201/203 (99.0)         |
| <b>Usual Care Strategy</b>                                                                                               |                        |
| Patients who were discharged from the ED                                                                                 | 5991/12,044 (49.7)     |
| Patients who were admitted to the hospital                                                                               | 6053/12,044 (50.3)     |
| Patients with an initial abdominal CT                                                                                    | 5380/12,044 (44.7)     |
| Patients without an initial abdominal CT                                                                                 | 6664/12,044 (55.3)     |
| Patients without an initial abdominal CT and sent directly for laparotomy                                                | 11/6,664 (0.2)         |
| Patients with an IAI who had an initial abdominal CT (sensitivity)†                                                      | 191/192 (99.5)         |
| Patients without an IAI who did not have an initial abdominal CT (specificity)                                           | 6652/11,841 (56.2)     |
| Patients with an initial abdominal CT who had an IAI ‡                                                                   | 191/5380 (3.6)         |
| Patients without an initial abdominal CT who had an IAI (missed IAI) ‡                                                   | 1/6,653 (0.02)         |
| Patients with an initial abdominal CT who were discharged home                                                           | 1697/5,380 (31.5)      |
| Patients with an initial abdominal CT who were admitted to the hospital                                                  | 3683/5,380 (68.5)      |
| Patients without an initial abdominal CT who were discharged home‡                                                       | 4294/6,653 (64.5)      |
| Patients without an initial abdominal CT who were admitted to the hospital‡                                              | 2359/6,653 (35.5)      |
| Patients without an initial abdominal CT, discharged home, and had an IAI (missed IAI)                                   | 1/4,294 (0.02)         |
| Patients without initial abdominal CT, admitted to hospital, and had an IAI (missed IAI)                                 | 0/2,370 (0)            |
| Patients with a missed IAI who required therapeutic laparotomy or angiography                                            | 1/1 (100)              |
| <b>TOTAL MISSED IAI WITH USUAL CARE STRATEGY</b>                                                                         | <b>1/12,044 (0.0)</b>  |
| <b>Clinical Decision Rule Strategy</b>                                                                                   |                        |
| Patients with at least one CDR variable present (CDR+)§                                                                  | 7,010/12,044 (58.2)    |
| Patients with no CDR variables present (CDR-)                                                                            | 5,034/12,044 (41.8)    |
| Patients CDR+ with an initial abdominal CT                                                                               | 4,126/7,010 (58.9)     |
| Patients CDR+ without an initial abdominal CT                                                                            | 2,884/7,010 (41.1)     |
| Patients CDR+ without an initial abdominal CT and sent directly for laparotomy                                           | 11/2,884 (0.4)         |
| Patients CDR+ with an initial abdominal CT and with IAI ‡                                                                | 192/4,126 (4.7)        |
| Patients CDR+ without an initial abdominal CT and with IAI (missed IAI)‡                                                 | 1/2,873 (0.03)         |
| Patients CDR+ without an initial abdominal CT and discharged home‡                                                       | 1,867/2,873 (65.0)     |
| Patients CDR+ without an initial abdominal CT and admitted to the hospital‡                                              | 1,006/2,873 (35.0)     |
| Patients CDR+ without an initial abdominal CT, discharged home, and had an IAI (missed IAI)                              | 1/1,867 (0.05)         |
| Patients CDR+ without an initial abdominal CT, admitted to hospital, and with an IAI (missed IAI)‡                       | 0/1,006(0)             |
| Patients CDR- and with a missed IAI who received therapeutic laparotomy or angiography                                   | 1/1 (100)              |
| Patients CDR- with an initial abdominal CT                                                                               | 0/5,034 (0)            |
| Patients CDR- without an initial abdominal CT                                                                            | 5,034/5,034 (100)      |
| Patients CDR- without an initial abdominal CT and who had an IAI (missed IAI)                                            | 6/5,034 (0.1)          |
| Patients CDR- without an initial abdominal CT and who were discharged home                                               | 2,939/5,034 (58.4)     |
| Patients CDR- without an initial abdominal CT and who were admitted to the hospital                                      | 2,095/5,034 (41.6)     |
| Patients CDR- without an initial abdominal CT, discharged home, and with an IAI (missed IAI)                             | 0/2,939 (0)            |
| Patients CDR- without an initial abdominal CT, admitted to hospital, and with an IAI (missed IAI)                        | 6/2,095 (0.3)          |
| Patients CDR- and with a missed IAI who received therapeutic laparotomy or angiography                                   | 4/6 (66.7)             |
| Patients with an IAI who were CDR+ (sensitivity)                                                                         | 197/203 (97.0)         |
| Patients without an IAI who were CDR- (specificity)                                                                      | 5,028/11,841 (42.5)    |
| <b>TOTAL MISSED IAI WITH CLINICAL DECISION RULE STRATEGY</b>                                                             | <b>7/12,044 (0.06)</b> |

IAI = intra-abdominal injury requiring acute intervention; CDR+ = presence of one or more high risk variable identified in the PECARN clinical decision rule; CDR- = no high risk variable identified in the PECARN clinical decision rule

\* 103 patients received more than one intervention

† Sensitivity of usual care is based on initial ED CT ordering and excludes 11 patients with IAI who received laparotomy without CT imaging

‡ Excludes 11 patients with IAI who received laparotomy without CT imaging

§ Probabilities for CDR+ followed usual care strategy

| Key micro-costs* and probabilities                                                     |                     |                   |
|----------------------------------------------------------------------------------------|---------------------|-------------------|
| Resource                                                                               | Cost or probability | Key               |
| <b>Diagnostic</b>                                                                      |                     |                   |
| Comprehensive metabolic panel (CMP; includes liver function tests)                     | 12                  | cCMP              |
| Complete blood count (CBC)                                                             | 10                  | cCBC              |
| Total cost for blood work per day (CMP + CBC)                                          | 22                  | cTotal_Bloodwork  |
| Focused assessment of sonography for trauma (FAST)                                     | 161                 | cFAST             |
| Chest radiograph (CXR)                                                                 | 66                  | cCXR              |
| Pelvis radiograph (PXR)                                                                | 67                  | cPXR              |
| Extremity radiography (EXR)                                                            | 66                  | cEXR              |
| Computed tomography (CT), abdomen and pelvis with contrast                             | 418                 | cCT               |
| Sedation for abdominal CT                                                              | 51                  | cSedation         |
| Probability of sedation for abdominal CT                                               | 0.033               | pSedation         |
| Total costs for abdominal CT†                                                          | 420                 | cTotalCT          |
| <b>Treatment</b>                                                                       |                     |                   |
| Intravenous antiemetic medication (per day)                                            | 49                  | cIVantiemetic     |
| Intravenous fluids (per day)                                                           | 3                   | cIVfluids         |
| Intravenous pain medication (per day)                                                  | 10                  | cIVpainmeds       |
| Total cost for intravenous treatment per day (anti-emetics + fluids + pain management) | 62                  | cTotal_IVmeds     |
| Transfusion of packed red blood cells (per unit)                                       | 711                 | cRBC              |
| Transfusion of fresh frozen plasma (per unit)                                          | 1122                | cFFP              |
| Angiography for embolization                                                           | 1000                | cAngiography      |
| Probability for angiography                                                            | 0.09                | pAngiography      |
| Laparotomy procedure                                                                   | 800                 | cLaparotomy       |
| Intubation procedure                                                                   | 6                   | cETT              |
| Mechanical ventilation (per day)                                                       | 463                 | cMechVent         |
| Total cost of mechanical ventilation‡                                                  | 839                 | cTotal_MechVent   |
| Probability for therapeutic laparotomy                                                 | 0.91                | pLaparotomy       |
| Pre-operating room                                                                     | 359                 | cPACU             |
| Operating room (1 <sup>st</sup> hour)                                                  | 801                 | cOR1sthr          |
| Operating room (each additional hour)                                                  | 500                 | cORaddhr          |
| Total cost of therapeutic laparotomy§                                                  | 2835                | cTotal_Laparotomy |
| <b>Boarding</b>                                                                        |                     |                   |
| Trauma service activation                                                              | 1396                | cTraumaActivation |
| Level 5 ED visit                                                                       | 593                 | cLevel5EDvisit    |
| Boarding cost on the floor (per day)                                                   | 1074                | cFloor            |
| Boarding cost in the intensive care unit (per day)                                     | 2484                | cICU              |

\* Estimated 2011 hospital costs derived from single center data

† Total cost of abdominal CT = CT abdomen and pelvis with contrast + (sedation \* probability of sedation)

‡ Total cost of mechanical ventilation = intubation + (mechanical ventilation \* 1.8 days)

§ Total cost of therapeutic laparotomy = laparotomy procedure + pre-operating room + operating room, 1<sup>st</sup> hour + (operating room, additional hour \* 1.75)

| Cost summaries for end nodes†                                                     |                                                                                      |                                                                                                                                                                                      |                                                                        |
|-----------------------------------------------------------------------------------|--------------------------------------------------------------------------------------|--------------------------------------------------------------------------------------------------------------------------------------------------------------------------------------|------------------------------------------------------------------------|
| End node                                                                          | Diagnostic Cost Summation                                                            | Therapeutic Cost Summation                                                                                                                                                           | Boarding Cost Summation                                                |
| Patient with IAI requiring therapeutic laparotomy or angiography                  | $(cTotal\_Bloodwork * days\ in\ hospital) + cFAST + cCXR + cPXR + cEXR + cTotal\_CT$ | $(cTotal\_IVmeds * days\ in\ hospital) + (cRBC * units\ of\ RBCs) + (cFFP * units\ of\ FFP) + (cTotal\_Laparotomy * pLaparotomy) + (cAngiography * pAngiography) + cTotal\_MechVent$ | $cTraumaActivation + cLevel5EDvisit + (cICU * days) + (cFloor * days)$ |
| Patient with IAI requiring a blood transfusion or IV fluids for 2 or more nights  | $(cTotal\_Bloodwork * days\ in\ hospital) + cCXR + cPXR + cEXR + cTotal\_CT$         | $(cTotal\_IVmeds * days\ in\ hospital) + (cRBC * units) + (cFFP * units)$                                                                                                            | $cTraumaActivation + cLevel5EDvisit + (cICU * days) + (cFloor * days)$ |
| Patient with no IAI, receiving an abdominal CT scan, and admitted to hospital     | $(cTotal\_Bloodwork * days\ in\ hospital) + cCXR + cPXR + cEXR + cTotal\_CT$         | $cTotal\_IVmeds * days\ in\ hospital$                                                                                                                                                | $cLevel5EDvisit + (cICU * days) + (cFloor * days)$                     |
| Patient with no IAI, receiving an abdominal CT scan, and discharged home          | $cTotal\_Bloodwork + cCXR + cPXR + cEXR + cTotal\_CT$                                | None                                                                                                                                                                                 | $cLevel5EDvisit$                                                       |
| Patient with no IAI, not receiving an abdominal CT scan, and admitted to hospital | $(cTotal\_Bloodwork * days\ in\ hospital) + cCXR$                                    | $cTotal\_IVmeds * days\ in\ hospital$                                                                                                                                                | $cLevel5EDvisit + (cICU * days) + (cFloor * days)$                     |
| Patient with no IAI, not receiving an abdominal CT scan, and discharged home      | $(cTotal\_Bloodwork * days\ in\ hospital) + cCXR$                                    | None                                                                                                                                                                                 | $cLevel5EDvisit$                                                       |
| Patient with a missed IAI                                                         | $(cTotal\_Bloodwork * days\ in\ hospital) + cCXR + cPXR + cEXR + cTotal\_CT$         | $cTotal\_IVmeds * days\ in\ hospital) + (cRBC * units) + (cFFP * units)$                                                                                                             | $cLevel5EDvisit + (cICU * days) + (cFloor * days)$                     |

IAI = intra-abdominal injury requiring acute intervention

†See Data Supplement 2 for individual micro-costs

| Units per end node                                                                        |                                                      |                                              |                                   |                                       |
|-------------------------------------------------------------------------------------------|------------------------------------------------------|----------------------------------------------|-----------------------------------|---------------------------------------|
| End node                                                                                  | Days<br>admitted<br>to the<br>intensive<br>care unit | Days<br>admitted to<br>the hospital<br>floor | Units of<br>red<br>blood<br>cells | Units of<br>fresh<br>frozen<br>plasma |
| Patient with IAI requiring therapeutic laparotomy or angiography                          | 1.8                                                  | 4.5                                          | 0.3                               | 0.2                                   |
| Patient with IAI requiring a blood transfusion or intravenous fluids for 2 or more nights | 1.4                                                  | 2.4                                          | 0.3                               | 0.2                                   |
| Patient with no IAI, receiving an abdominal CT scan, and admitted to hospital             | 0                                                    | 1                                            | 0                                 | 0                                     |
| Patient with no IAI, receiving an abdominal CT scan, and discharged home                  | 0                                                    | 0                                            | 0                                 | 0                                     |
| Patient with no IAI, not receiving an abdominal CT scan, and admitted to hospital         | 0                                                    | 1                                            | 0                                 | 0                                     |
| Patient with no IAI, not receiving an abdominal CT scan, and discharged home              | 0                                                    | 0                                            | 0                                 | 0                                     |
| Patient with a missed IAI                                                                 | 1.8                                                  | 4.5                                          | 0.3                               | 0.2                                   |

IAI = intra-abdominal injury requiring acute intervention
